# Supplementary material for: Small area estimation of under-5 mortality in Bangladesh, Cameroon, Chad, Mozambique, Uganda, and Zambia using spatially misaligned data
Source: Springer Nature journal article supplement (doi:10.1186/s12963-018-0171-7), 2018-08-13

Comparison of U5MR estimates in this analysis and Golding et al.

# Cameroon

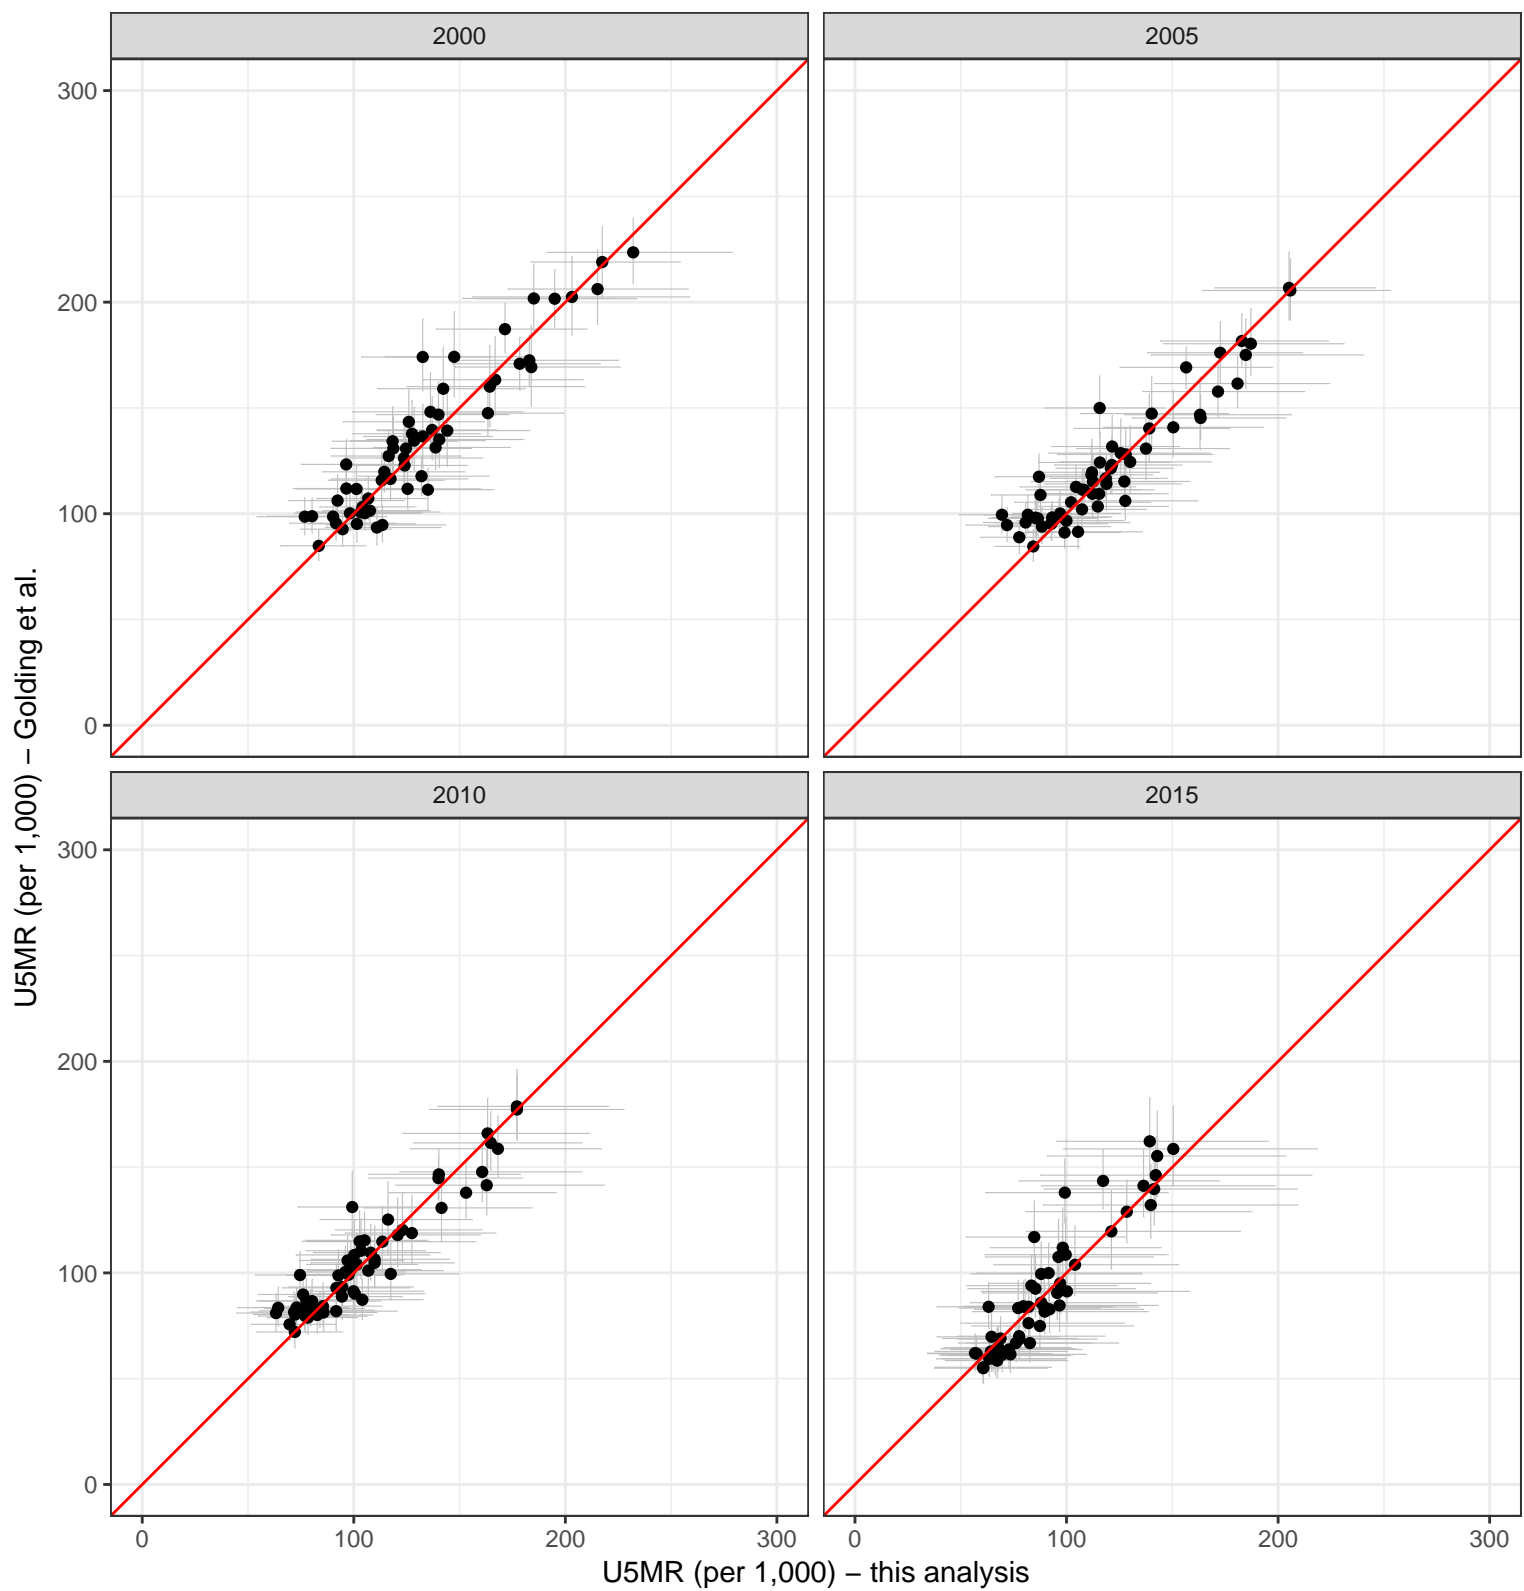

Comparison of U5MR estimates in this analysis and Golding et al.

# Chad

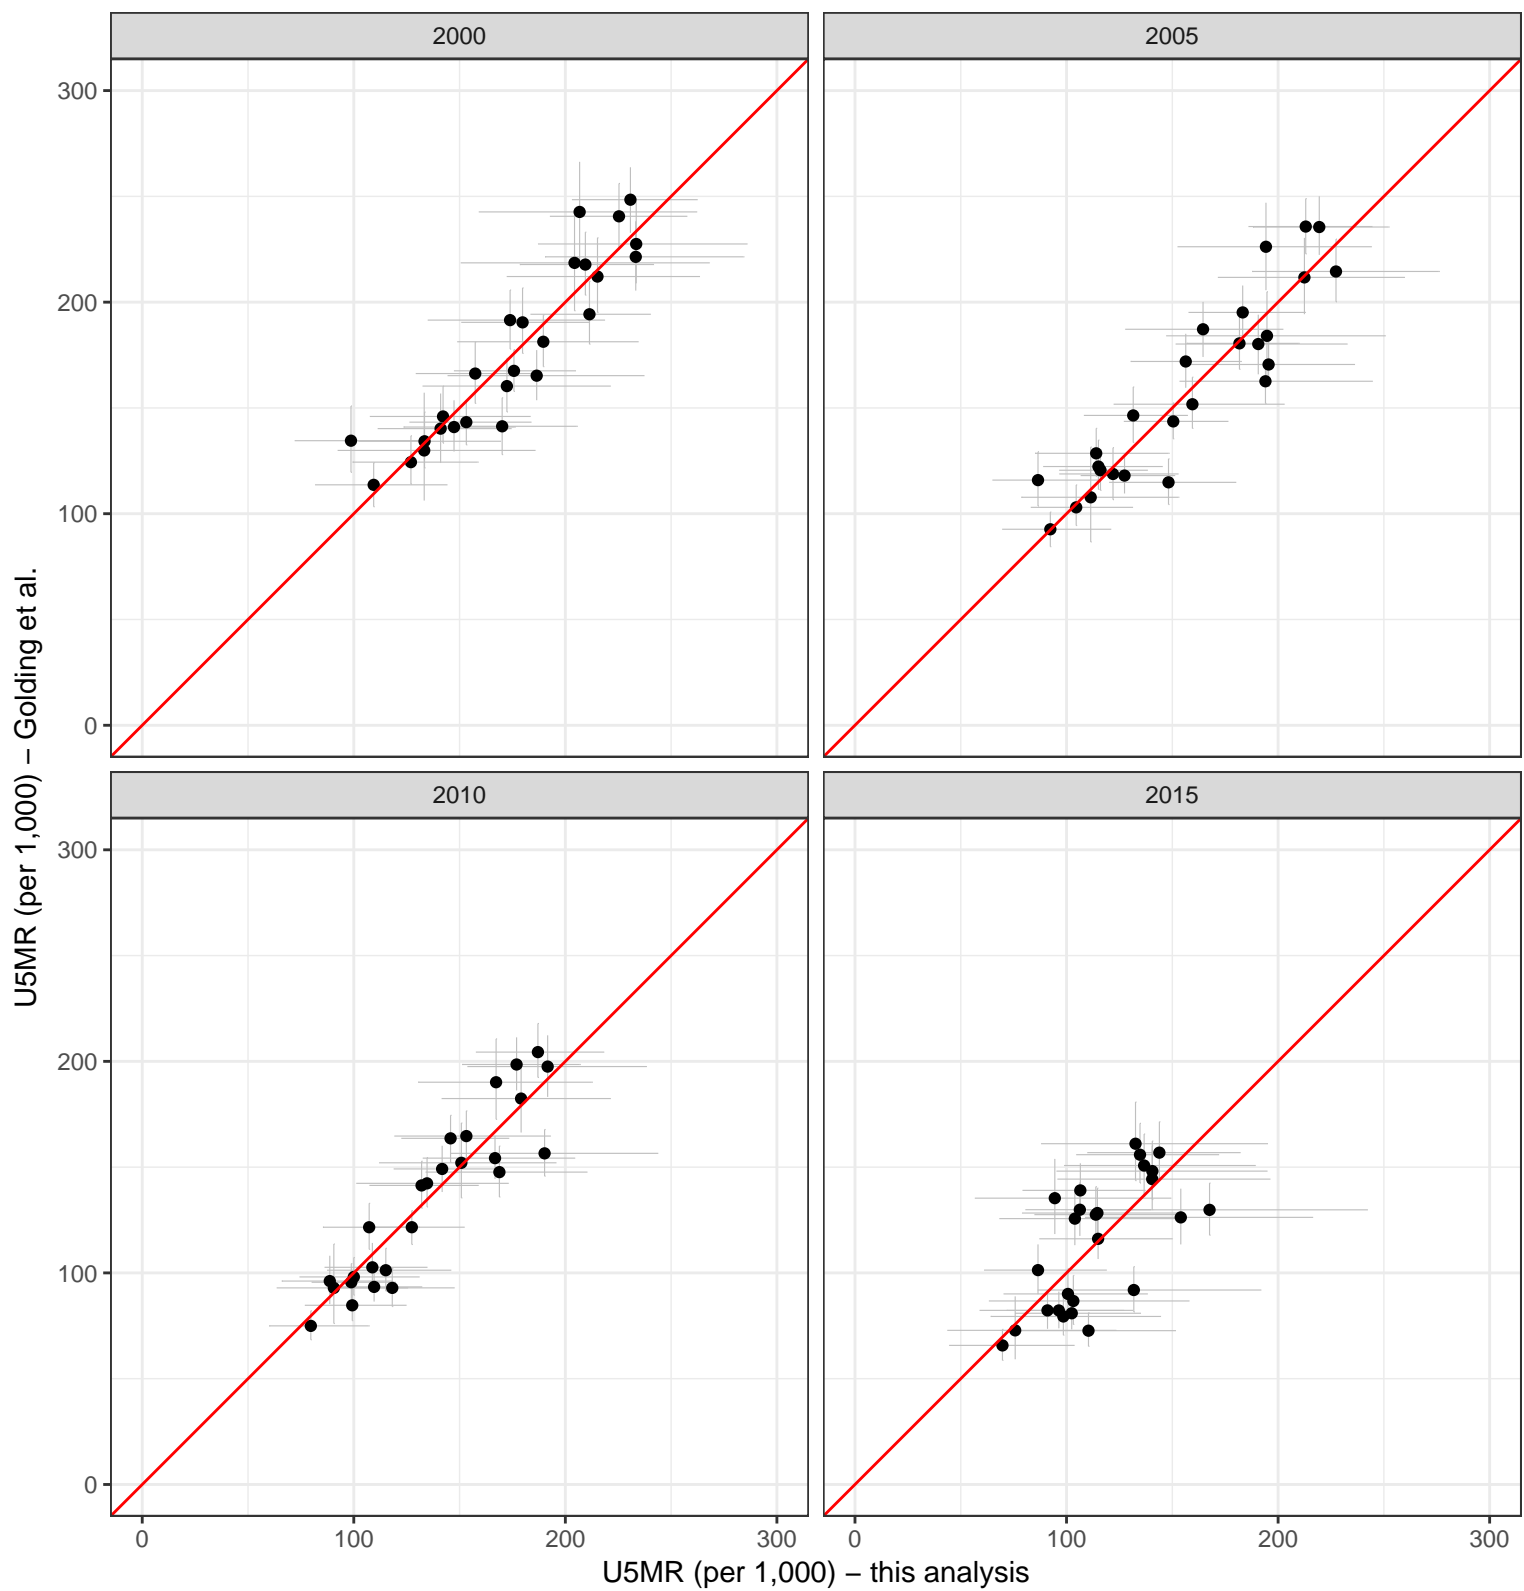

Comparison of U5MR estimates in this analysis and Golding et al.

## Mozambique

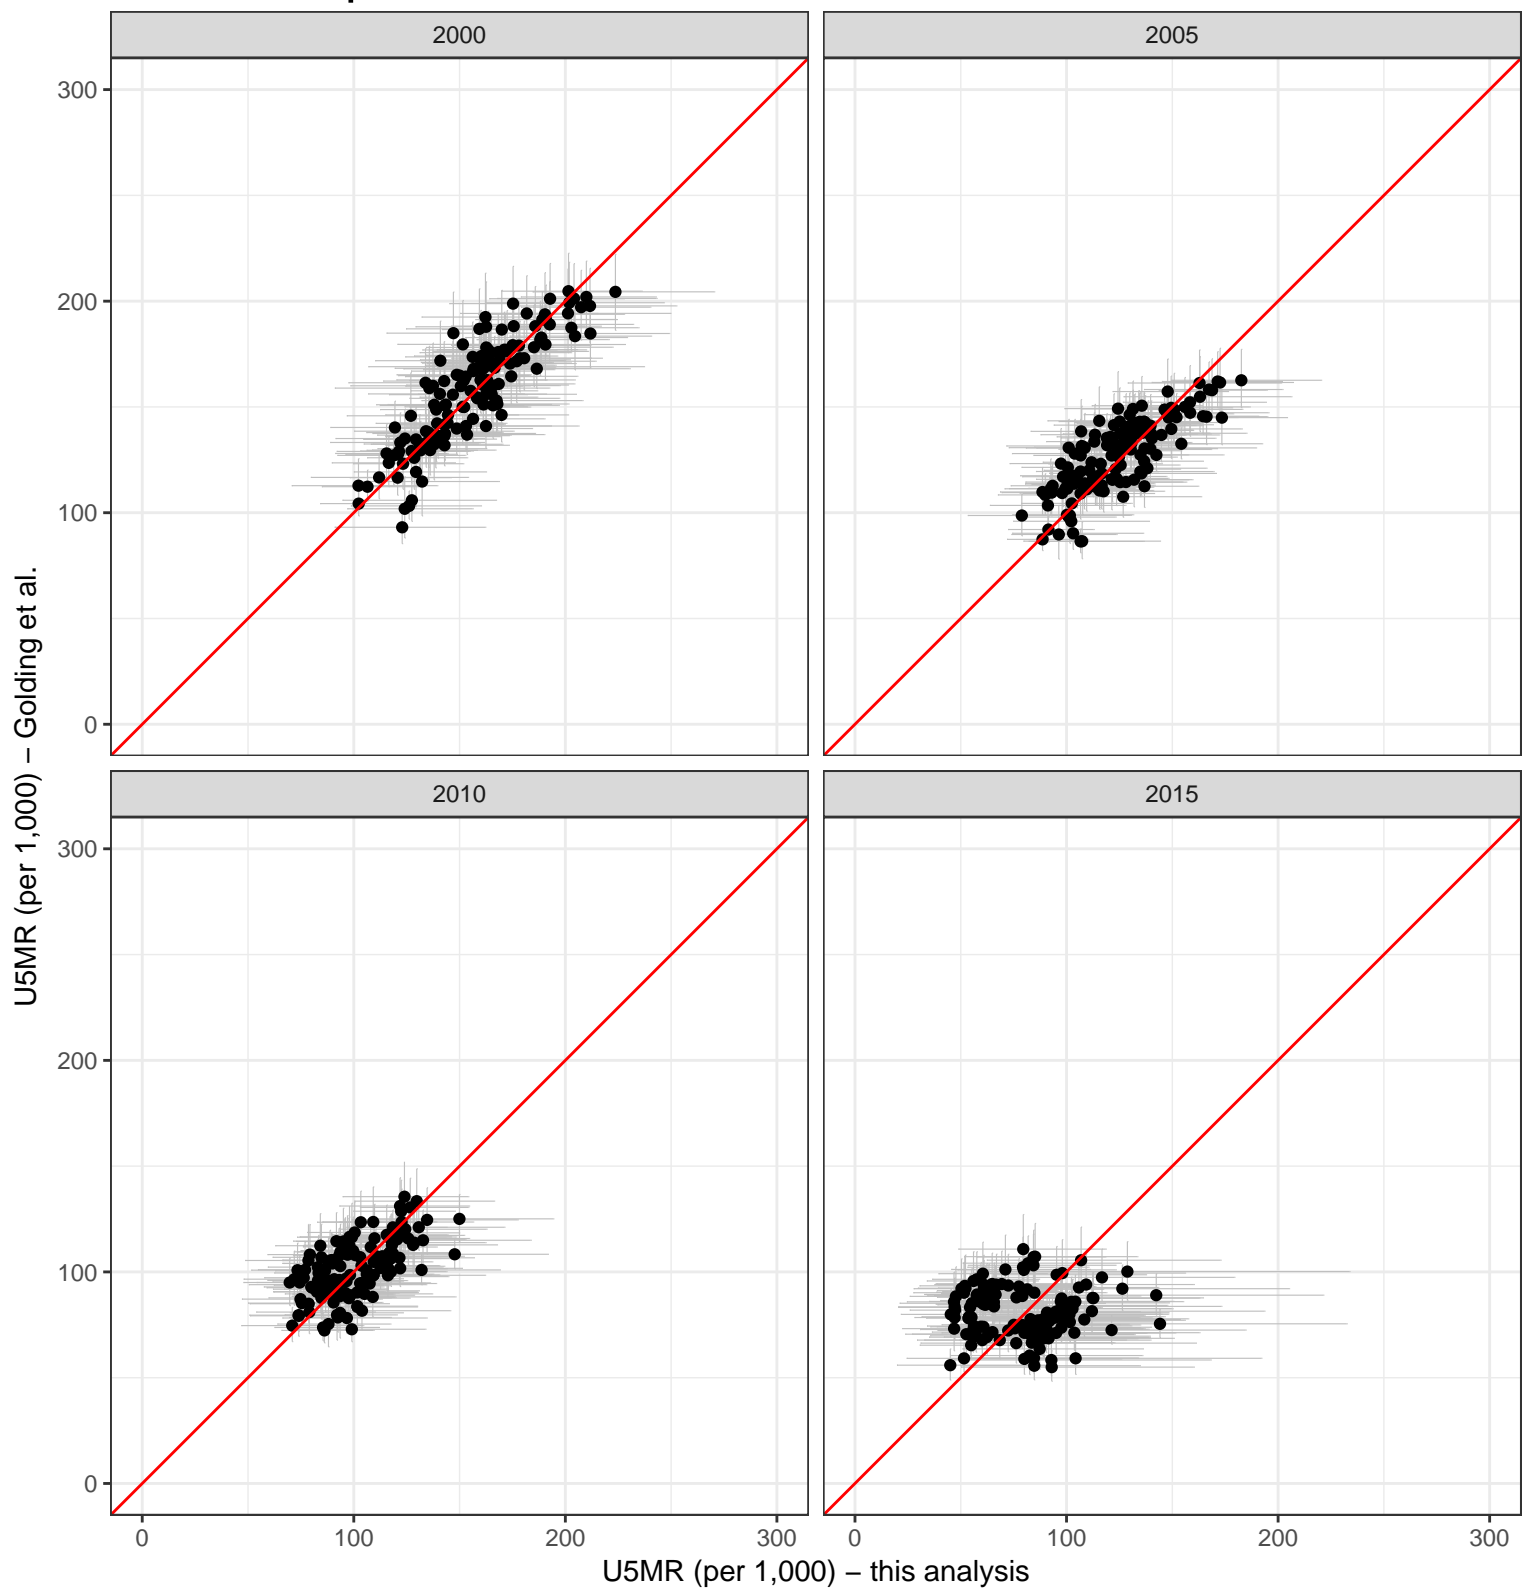

Comparison of U5MR estimates in this analysis and Golding et al.

## Uganda

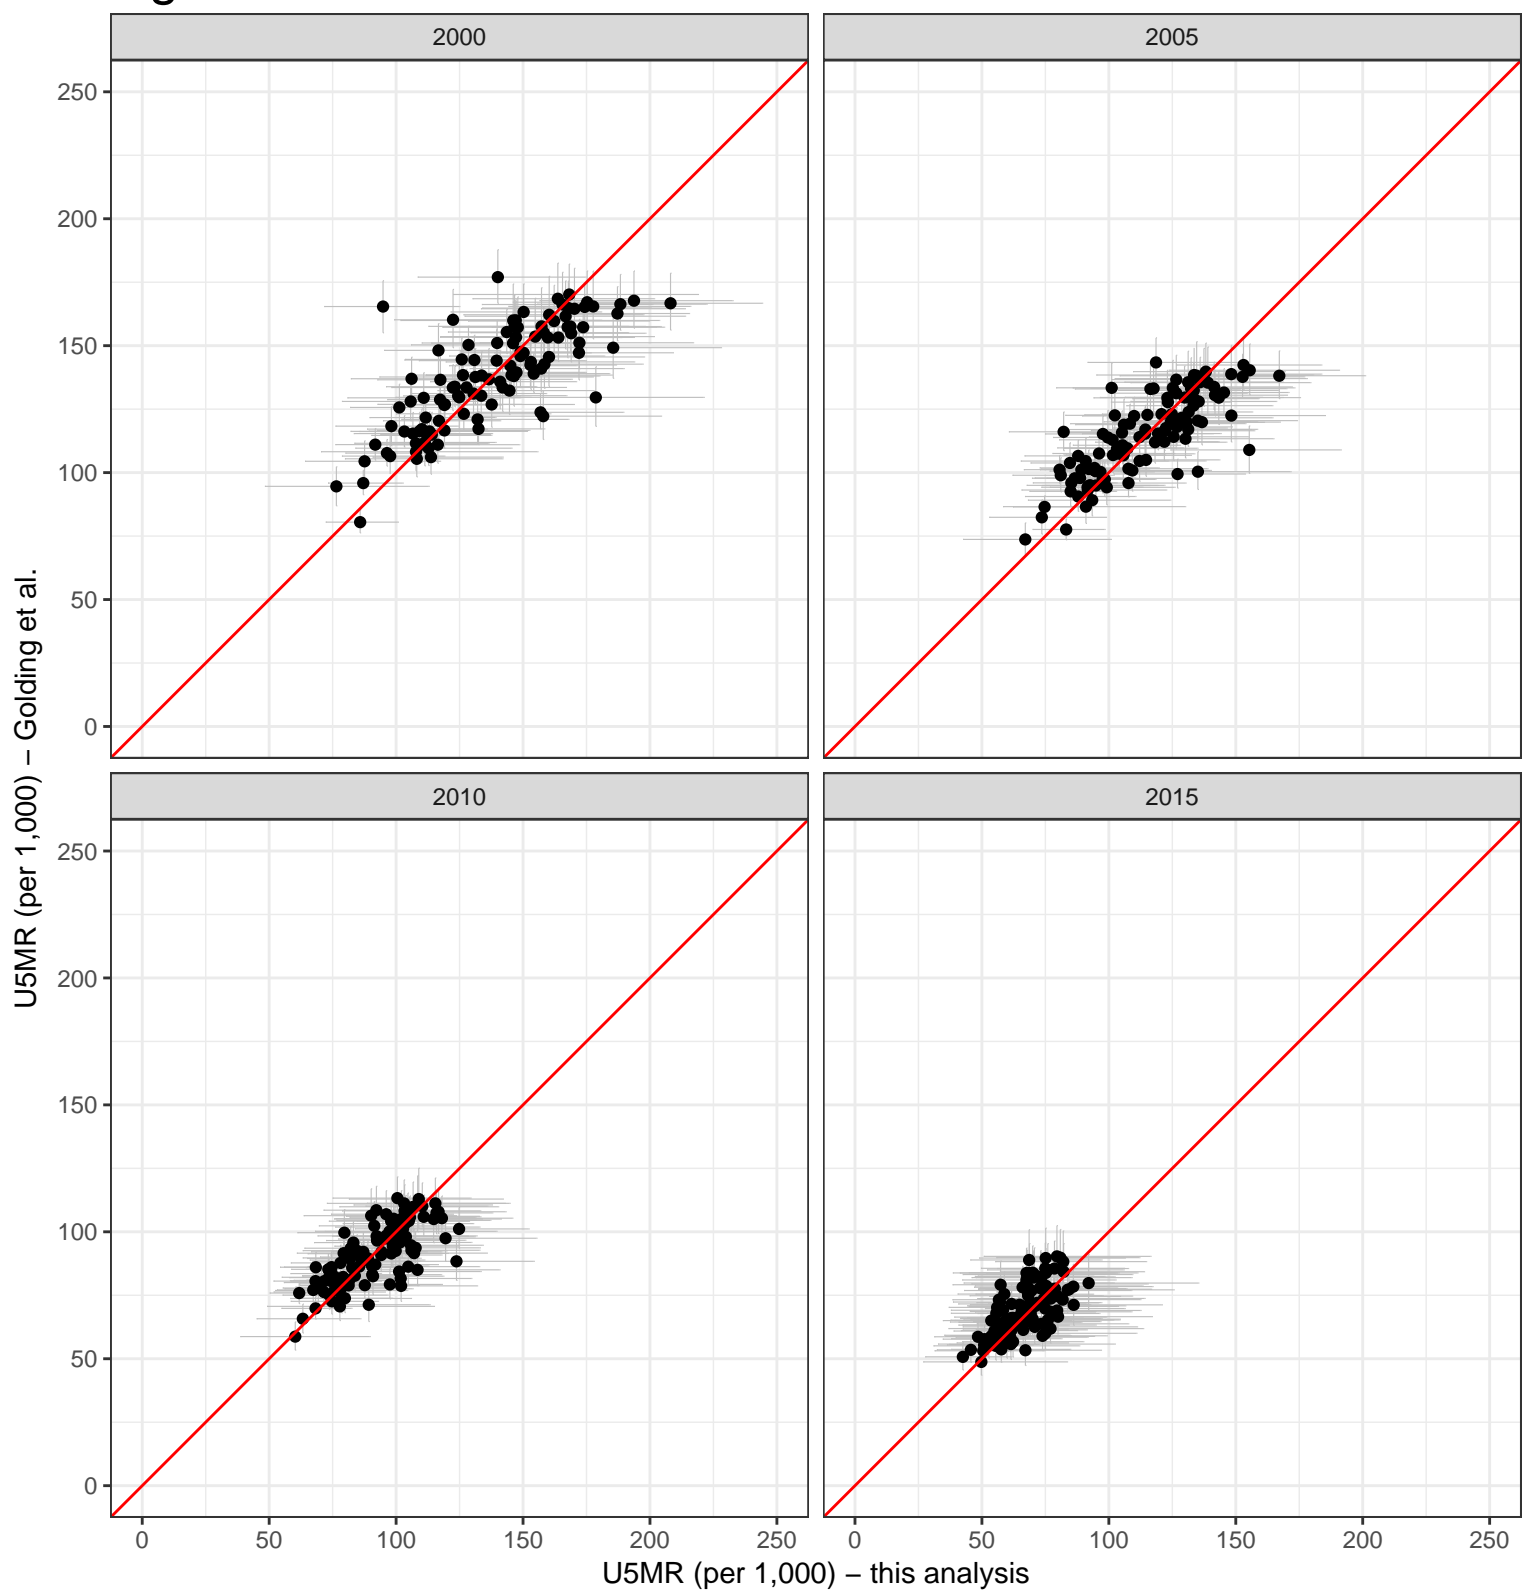

Comparison of U5MR estimates in this analysis and Golding et al.

# Zambia

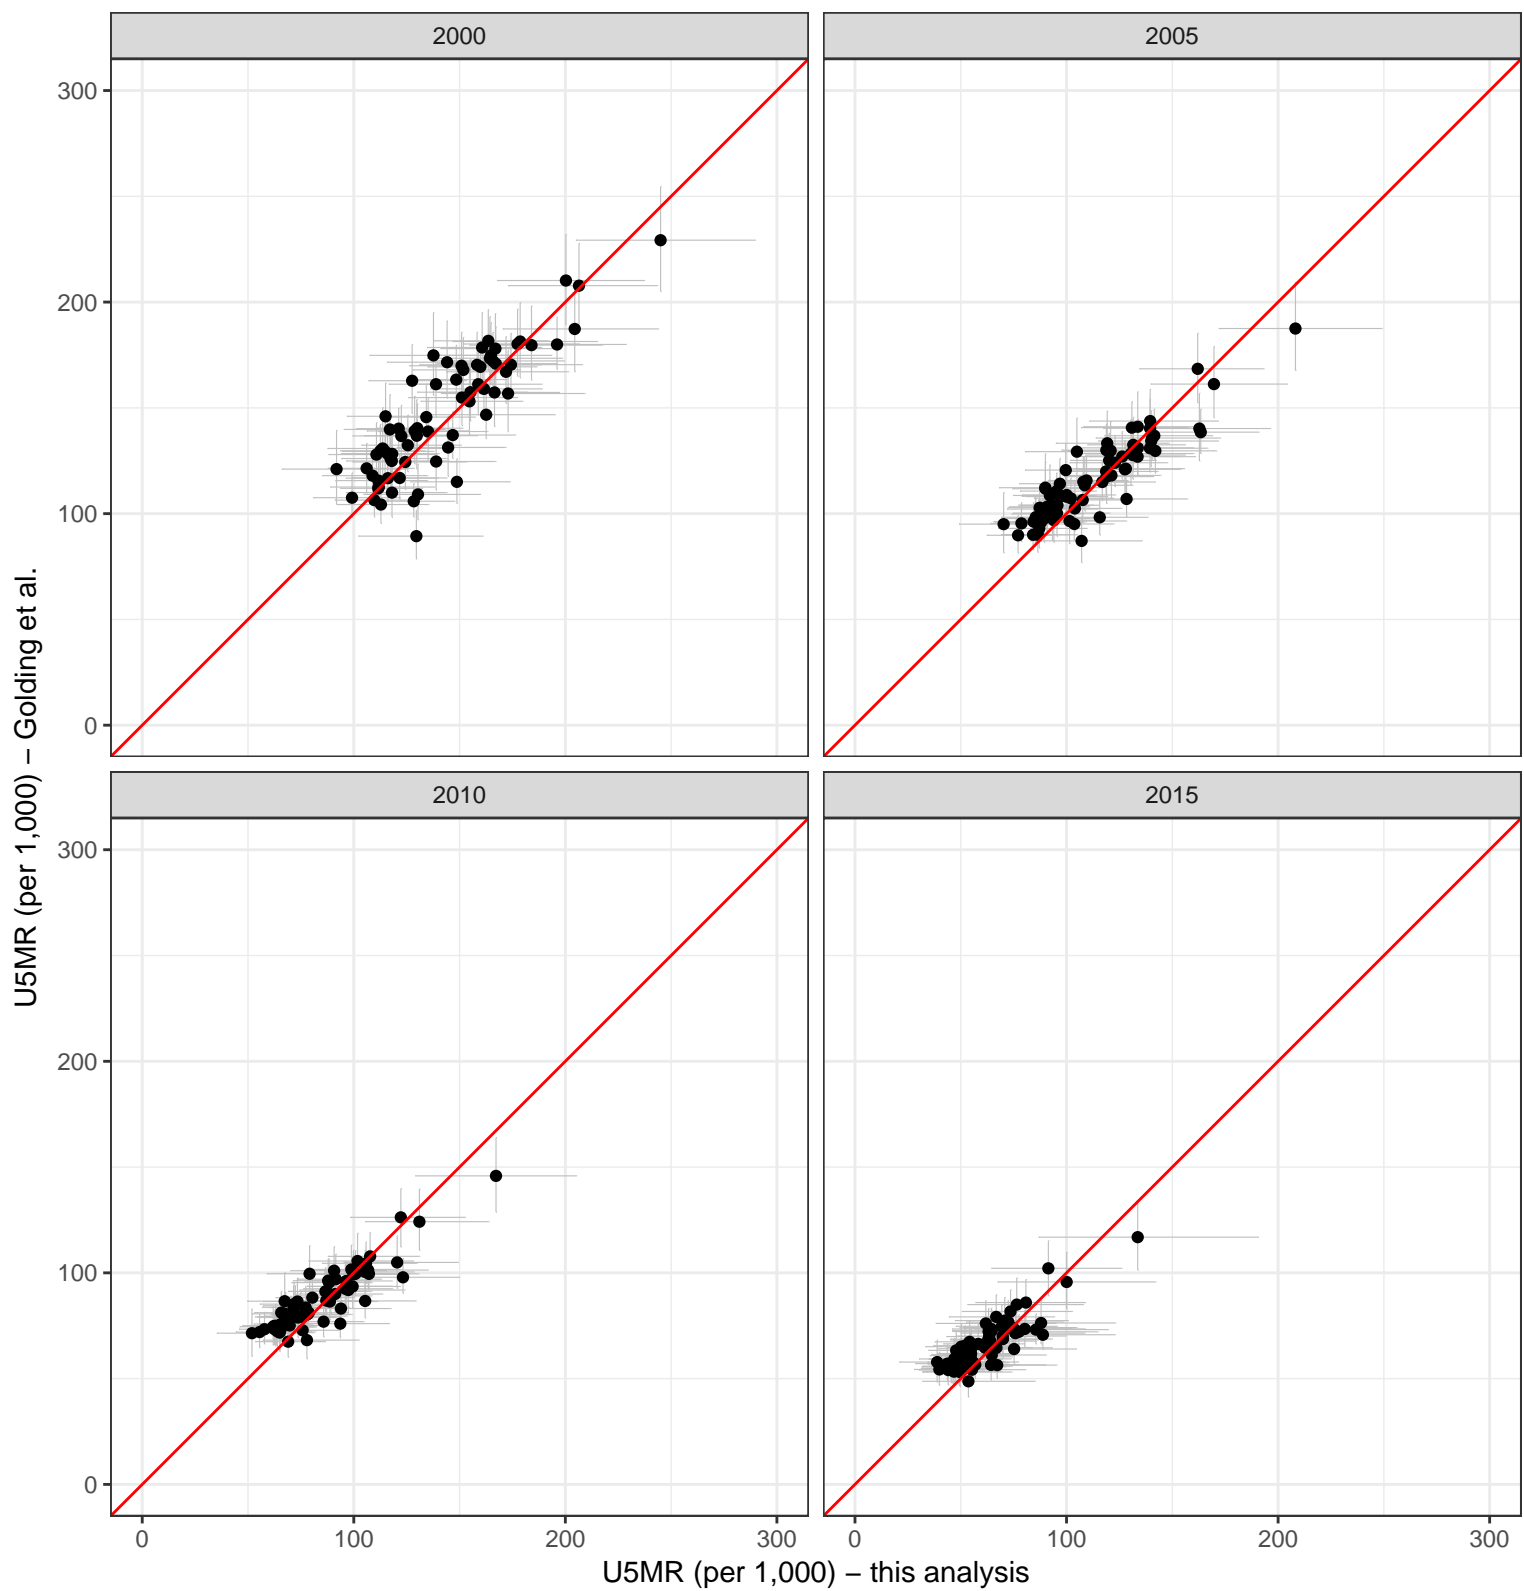

Supplement: MOESM3 [file 16031418]
